# Supplementary material for: Cerebellar Hemorrhage in Preterm Infants: A Meta-Analysis on Risk Factors and Neurodevelopmental Outcome
Source: PubMed Central journal article supplement (PMC6603211; doi:10.3389/fphys.2019.00800), 2019-06-25
Supplement: Data_Sheet_1.pdf [file Data_Sheet_1.pdf]

## *Supplementary Material*

### **Cerebellar hemorrhage in preterm infants: a meta-analysis on risk factors and neurodevelopmental outcome**

**Eduardo Villamor-Martinez<sup>1#</sup>, Monica Fumagalli<sup>2,3#</sup>, Yaser Ibrahim Alomar<sup>1</sup>, Sofia Passera<sup>2</sup>, Giacomo Cavallaro<sup>2</sup>, Fabio Mosca<sup>2,3</sup>, Eduardo Villamor<sup>1\*</sup>**

<sup>1</sup>Department of Pediatrics, School for Oncology and Developmental Biology (GROW), Maastricht University Medical Center, Maastricht, Netherlands

<sup>2</sup>Neonatal Intensive Care Unit, Fondazione IRCCS Cà Granda Ospedale Maggiore Policlinico, Milan, Italy

<sup>3</sup>Department of Clinical Sciences and Community Health, University of Milan, Milan, Italy

# Contributed equally to this work

**\* Correspondence:**

Eduardo Villamor  
e.villamor@mumc.nl

## 1 Supplementary Tables

**Supplementary Table 1.** Quality assessment of included studies using the Newcastle Ottawa Scale.

| First author, year   | Selection | Comparability | Outcome/Exposure | Total | Reason for downgrade                                           |
|----------------------|-----------|---------------|------------------|-------|----------------------------------------------------------------|
| Biran, 2011          | 4         | 1             | 3                | 8     | Only matched for GA                                            |
| Chau, 2012           | 3         | 0             | 3                | 6     | CBH not defined, No adjustment for confounders                 |
| Duerden, 2013        | 3         | 0             | 3                | 6     | CBH not defined, No adjustment for confounders                 |
| Dyet, 2006           | 4         | 0             | 3                | 7     | No adjustment for confounders                                  |
| Fumagalli, 2009      | 4         | 0             | 3                | 7     | No adjustment for confounders                                  |
| Gano, 2016           | 4         | 2             | 3                | 9     |                                                                |
| Haines, 2013         | 3         | 2             | 3                | 8     | Infants not comparable with other studies (all were autopsied) |
| Kidokoro, 2014       | 4         | 2             | 3                | 9     |                                                                |
| Limperopoulos, 2005a | 4         | 2             | 3                | 9     |                                                                |
| Limperopoulos, 2007  | 4         | 2             | 3                | 9     |                                                                |
| Neubauer, 2017       | 4         | 0             | 3                | 7     | No adjustment for confounders                                  |
| O'Shea, 2008         | 4         | 0             | 3                | 7     | No adjustment for confounders                                  |
| Steggerda, 2013      | 4         | 2             | 3                | 9     |                                                                |
| Tam, 2011            | 4         | 2             | 3                | 9     |                                                                |
| Zayek, 2012          | 4         | 2             | 3                | 9     |                                                                |

GA: gestational age; CBH: cerebellar hemorrhage.

**Supplementary Table 2.** Details on studies that reported neurodevelopmental outcomes

| <b>First author, year</b> | <b>Assessment method</b>                                                                            | <b>Time of assessment</b> | <b>Impairment defined as</b>                                                                         | <b>Summary of findings</b>                                                                                                                                           | <b>Comments</b>                                                                                          |
|---------------------------|-----------------------------------------------------------------------------------------------------|---------------------------|------------------------------------------------------------------------------------------------------|----------------------------------------------------------------------------------------------------------------------------------------------------------------------|----------------------------------------------------------------------------------------------------------|
| Biran 2011                | Neurological examination, Brunet-Lezine test for developmental quotient,                            | 2 years (not corrected)   | Developmental quotient score <70                                                                     | No significant difference between groups in any element of developmental quotient (global, postural, coordination, language or sociability).                         | Results of neurological examination not reported.                                                        |
| Dyet 2006                 | Neurological examination, CP, Griffiths Mental Development Scales for overall DQ                    | 18-36 months (corrected)  | Developmental quotient score <70                                                                     | CBH-infants had lower DQ (75 +- 24, n=5), compared with infants with normal MRI (112 +- 15, n=6). One infant with CBH had CP, compared to none in the control group. |                                                                                                          |
| Kidokoro 2014             | Neurological examination, CP assessment. BSID-II and BSID-III scale for MDI and PDI, CP assessment. | 2 years (corrected)       | BSID-II: MDI score <70, PDI score <70.<br>BSID-III: cognition or language score <80, motor score <70 | CBH was not significantly related to any adverse neurodevelopmental outcome                                                                                          | Two different cohorts: one cohort was evaluated with BSID-II, another cohort was evaluated with BSID-III |
| O'Shea 2008               | Neurological examination, BSID-II scale for MDI and PDI.                                            | 2 years (corrected)       | MDI score <70<br>PDI score <70                                                                       | Children who had bilateral cerebellar hemorrhages were at highest risk of developmental delays                                                                       | Results of neurological examination not reported.                                                        |
| Steggerda 2013            | Neurological examination according to Hempel, CP assessment (GMFCS), Neurodevelopment, BSID-III     | 2 years (corrected)       | Score 1 SD below normative mean                                                                      | No relation between small CBH and mildly or severely abnormal neurodevelopment.                                                                                      | Study only examined small CBH                                                                            |

| First author, year | Assessment method                                             | Time of assessment        | Impairment defined as                                                                    | Summary of findings                                                                                                                                                                                                                            | Comments |
|--------------------|---------------------------------------------------------------|---------------------------|------------------------------------------------------------------------------------------|------------------------------------------------------------------------------------------------------------------------------------------------------------------------------------------------------------------------------------------------|----------|
| Tam 2011           | Neurological examination, WPPSI-III for developmental outcome | 3-6 years (not corrected) | Not defined                                                                              | Infants with CBH had increased odds (OR 5.0, 95% CI 1.1-23.1) of neurological abnormalities at ages 3-6 compared to non-CBH infants, after adjusting for GA, IVH and white matter injury. No significant differences in developmental outcome. |          |
| Zayek 2012         | CP assessment, BSID-II and BSID-III for MDI and PDI.          | 12-18 months (corrected)  | MDI score <70, or any cognitive or language score <70. PDI score <70, or motor score <70 | Infants with CBH had higher rates of mental and motor impairment, and higher cerebral palsy rates. After adjustment, CBH was still associated with mental and motor impairment, but not with cerebral palsy.                                   |          |

BSID-II: Bayley Scales of Infant Development, Second Edition; MDI: Mental Development Index; PDI: Psychomotor Developmental Index; CBH: cerebellar hemorrhage; WPPSI-III: Wechsler Preschool Primary Scale of Intelligence; CP: Cerebral Palsy; GMFCS: Gross Motor Function Classification System; IVH: intraventricular hemorrhage; DQ: developmental quotient.

## 2 Supplementary Figures

### CBH and male sex (k = 7)

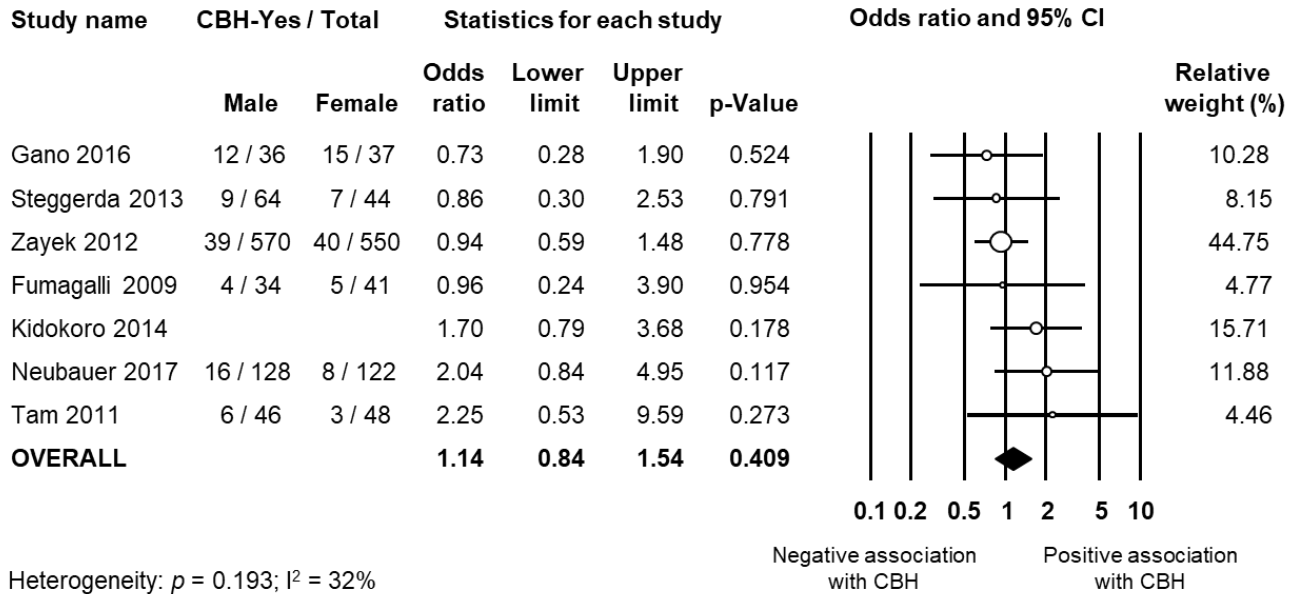

**Supplementary Figure 1.** Meta-analysis of cerebellar hemorrhage (CBH) and male sex. CI: confidence interval.

### CBH and multiple gestation (k = 7)

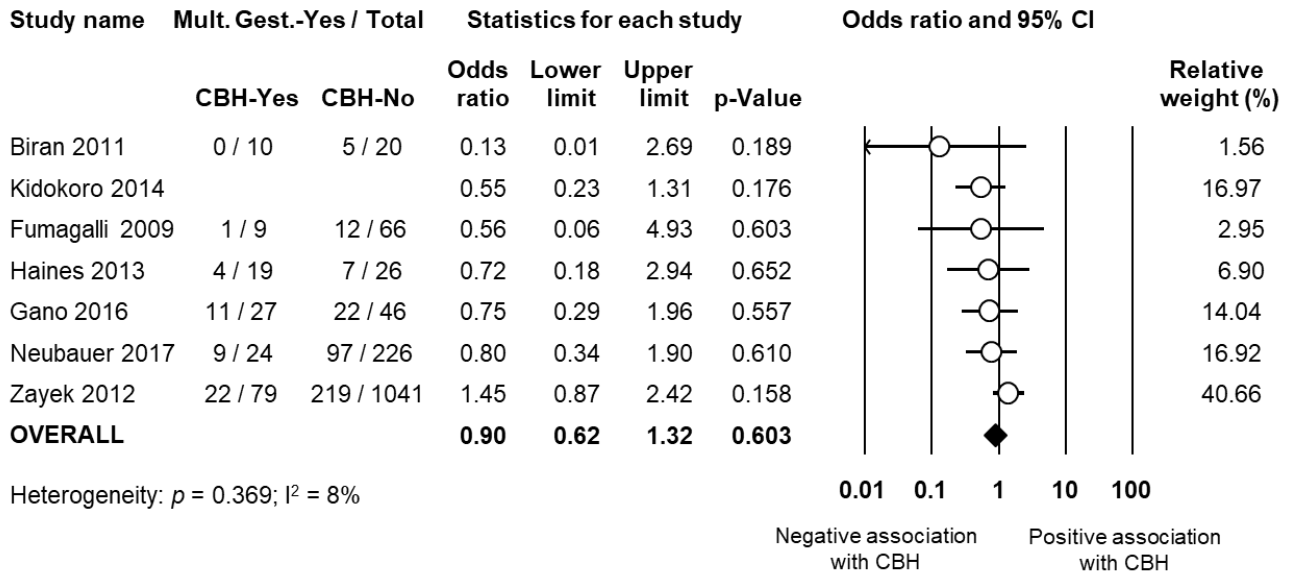

**Supplementary Figure 2.** Meta-analysis of cerebellar hemorrhage (CBH) and multiple gestation. CI: confidence interval.

**CBH and preeclampsia (k = 4)**

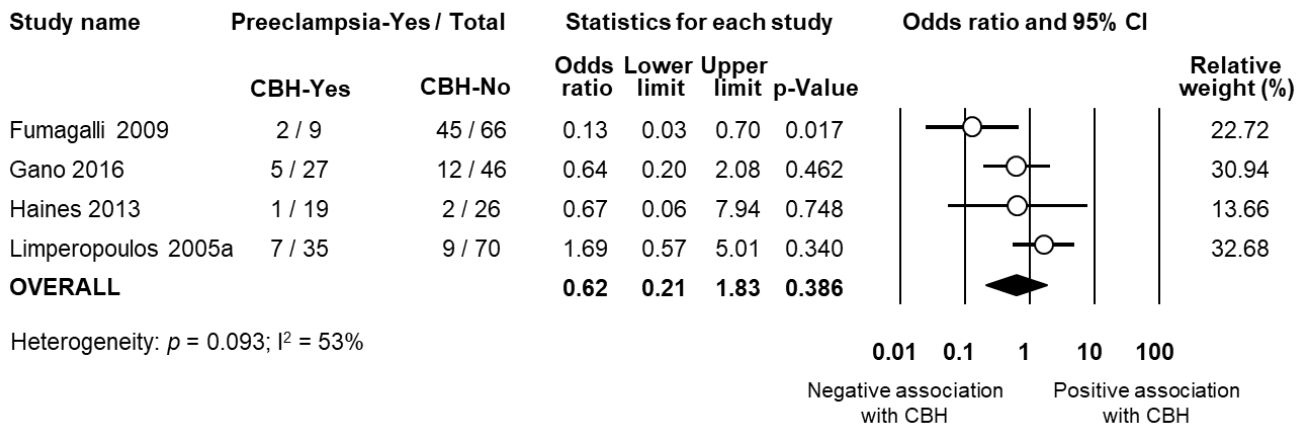

**Supplementary Figure 3.** Meta-analysis of cerebellar hemorrhage (CBH) and preeclampsia. CI: confidence interval.

**CBH and antenatal steroids (k = 9)**

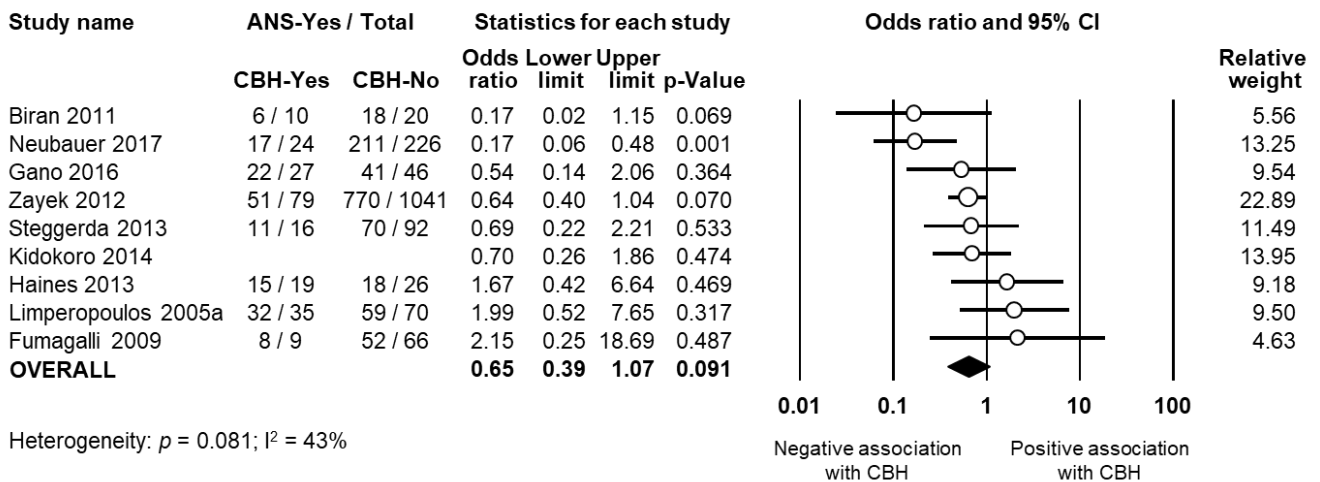

**Supplementary Figure 4.** Meta-analysis of cerebellar hemorrhage (CBH) and antenatal steroids. CI: confidence interval.

**CBH and placental abruption (k = 3)**

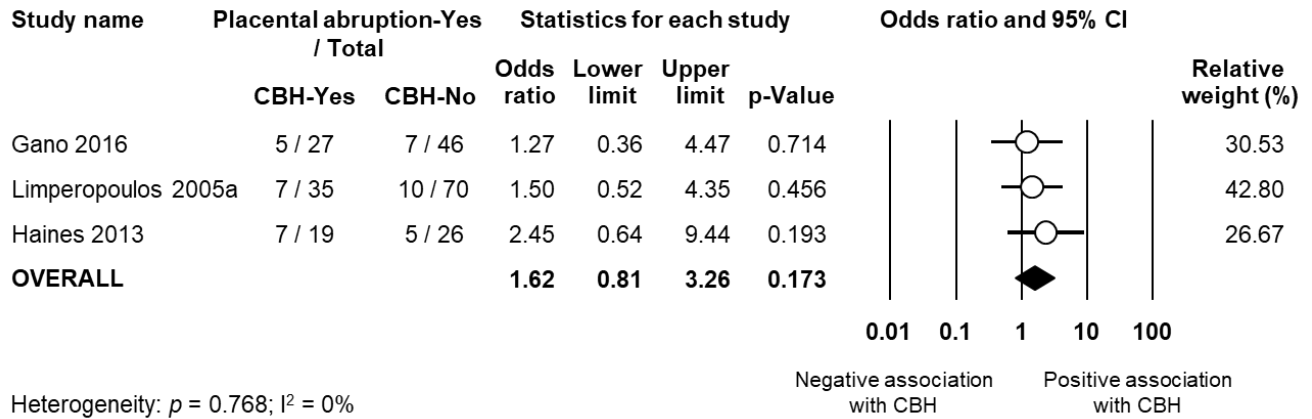

**Supplementary Figure 5.** Meta-analysis of cerebellar hemorrhage (CBH) and placental abruption. CI: confidence interval.

**CBH and chorioamnionitis (k = 5)**

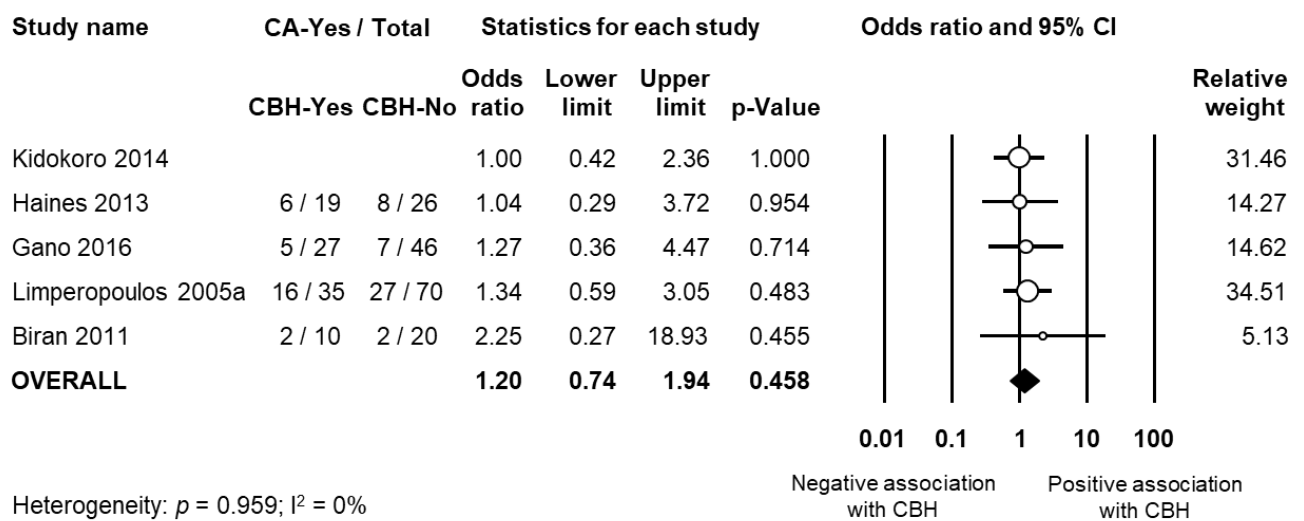

**Supplementary Figure 6.** Meta-analysis of cerebellar hemorrhage (CBH) and chorioamnionitis. CI: confidence interval.

**CBH and cesarean section (k = 9)**

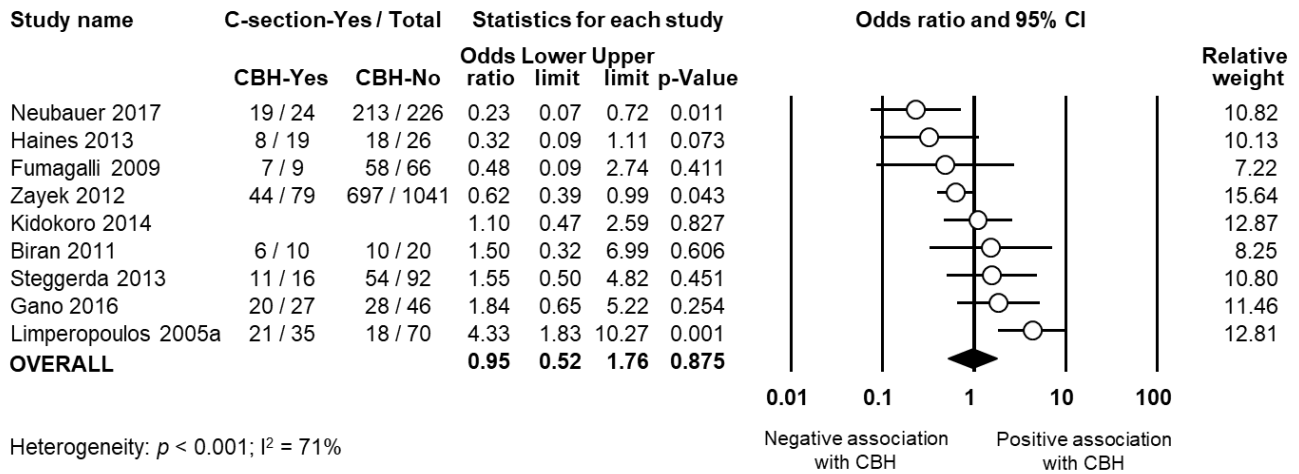

**Supplementary Figure 7.** Meta-analysis of cerebellar hemorrhage (CBH) and cesarean section. CI: confidence interval.

**CBH and maternal age (mean difference in years; k = 3)**

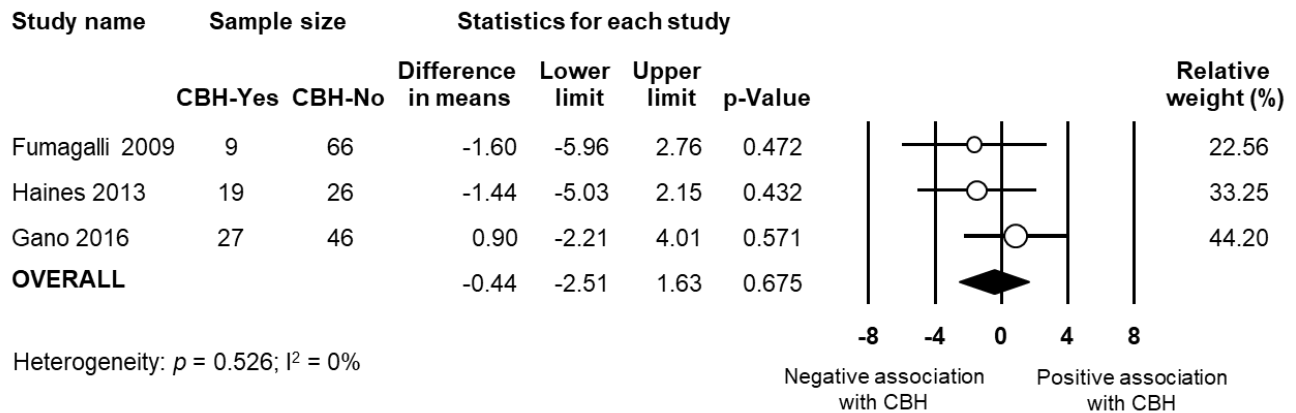

**Supplementary Figure 8.** Meta-analysis of cerebellar hemorrhage (CBH) and maternal age.



**CBH and intubation (k = 6)**

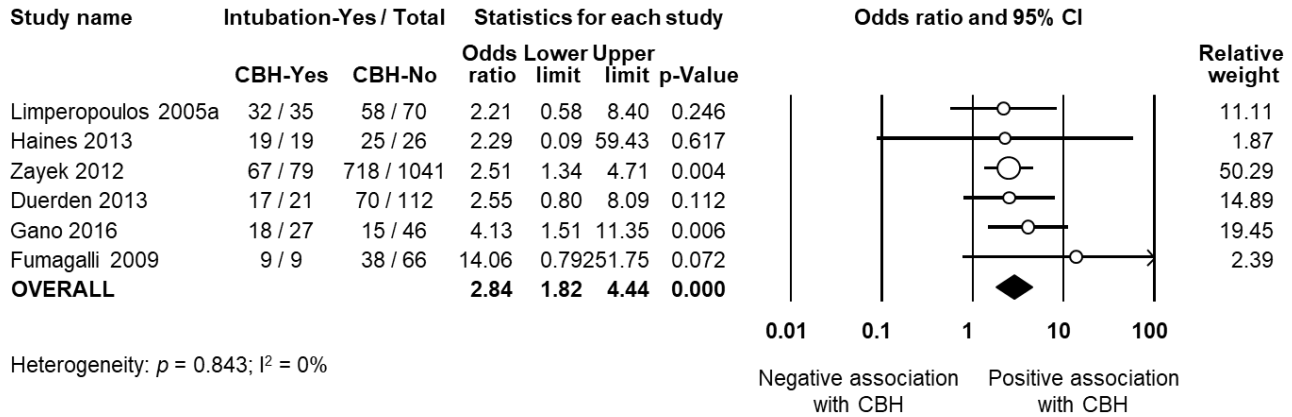

**Supplementary Figure 9.** Meta-analysis of cerebellar hemorrhage (CBH) and intubation. CI: confidence interval.

**CBH and hypotension (k = 7)**

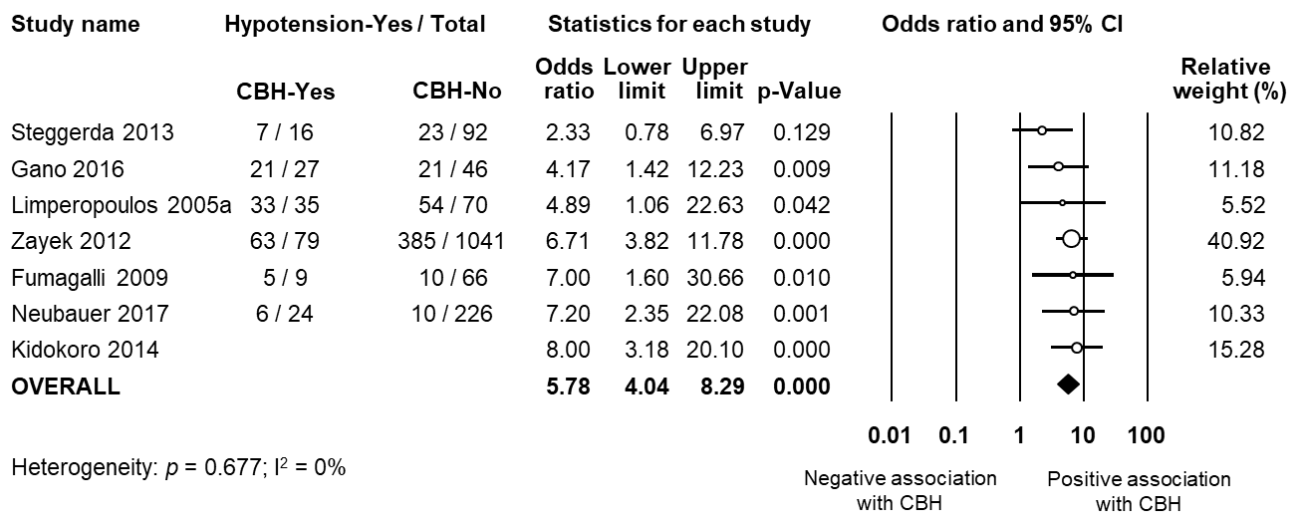

**Supplementary Figure 10.** Meta-analysis of cerebellar hemorrhage (CBH) and hypotension. CI: confidence interval.

**CBH and PDA (k = 8)**

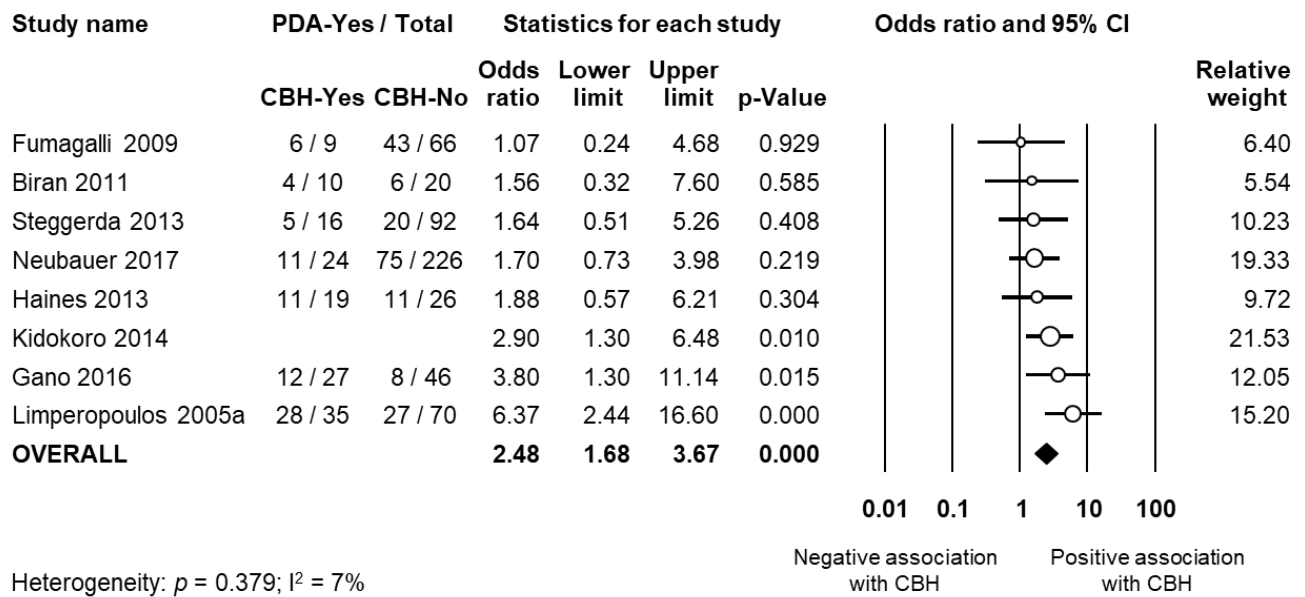

**Supplementary Figure 11.** Meta-analysis of cerebellar hemorrhage (CBH) and patent ductus arteriosus (PDA). CI: confidence interval.

**CBH and NEC (k = 6)**

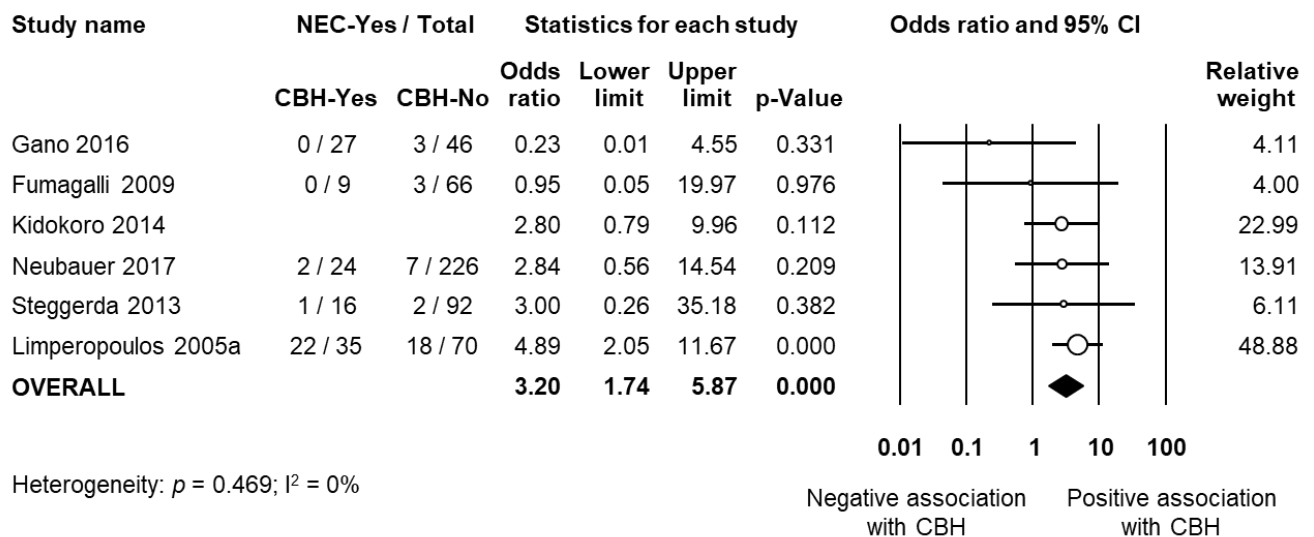

**Supplementary Figure 12.** Meta-analysis of cerebellar hemorrhage (CBH) and necrotizing enterocolitis (NEC). CI: confidence interval.

**CBH and sepsis (k = 10)**

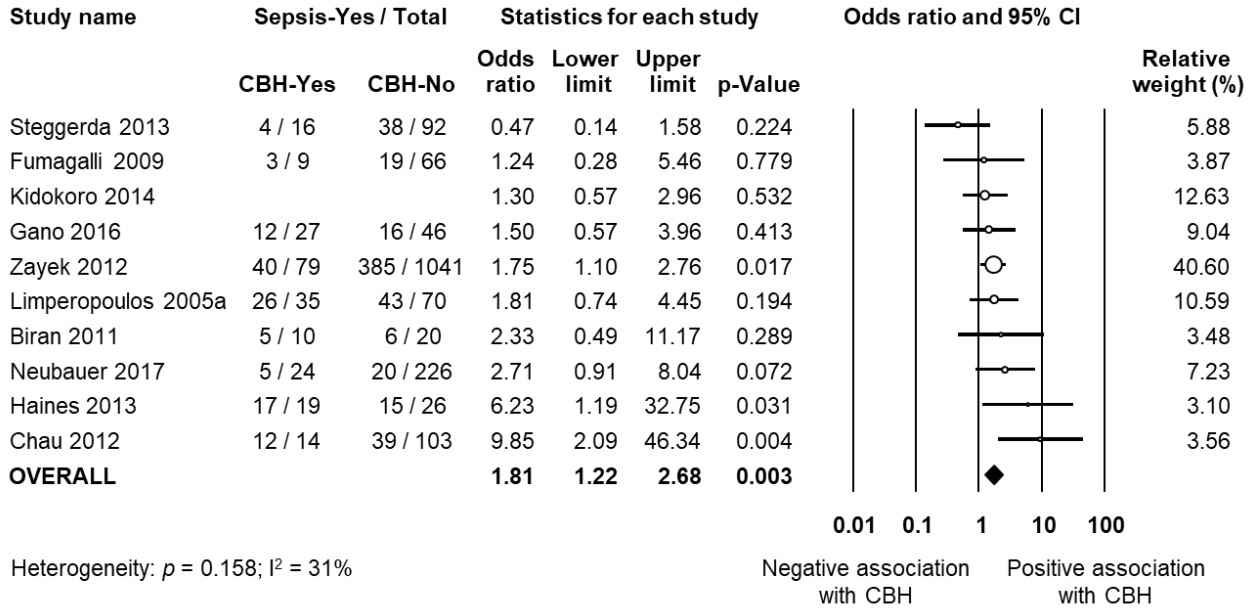

**Supplementary Figure 13.** Meta-analysis of cerebellar hemorrhage (CBH) and sepsis. CI: confidence interval.

**CBH and BPD (k = 4)**

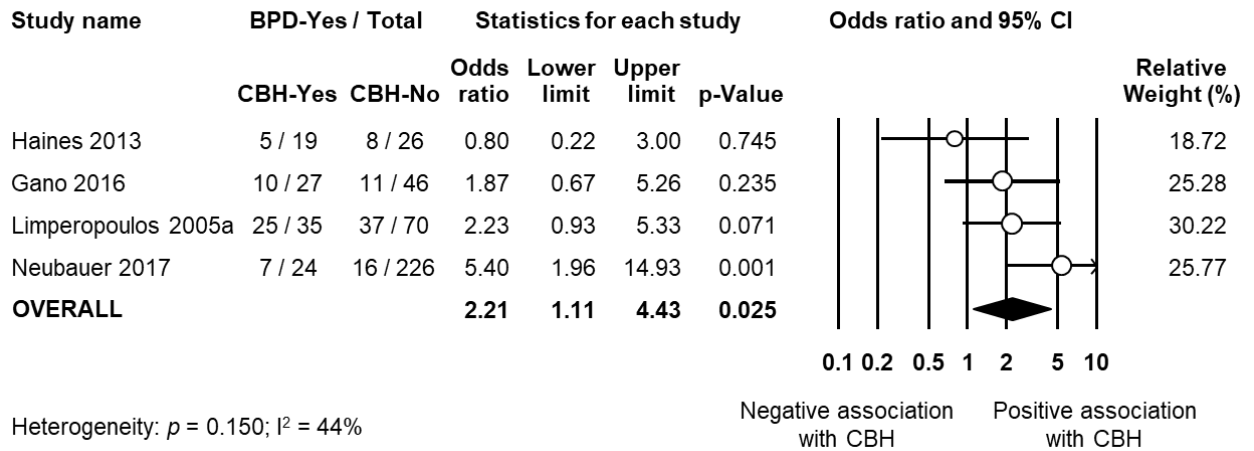

**Supplementary Figure 14.** Meta-analysis of cerebellar hemorrhage (CBH) and bronchopulmonary dysplasia (BPD). CI: confidence interval.

**CBH and IVH grade 1-2 (k = 5)**

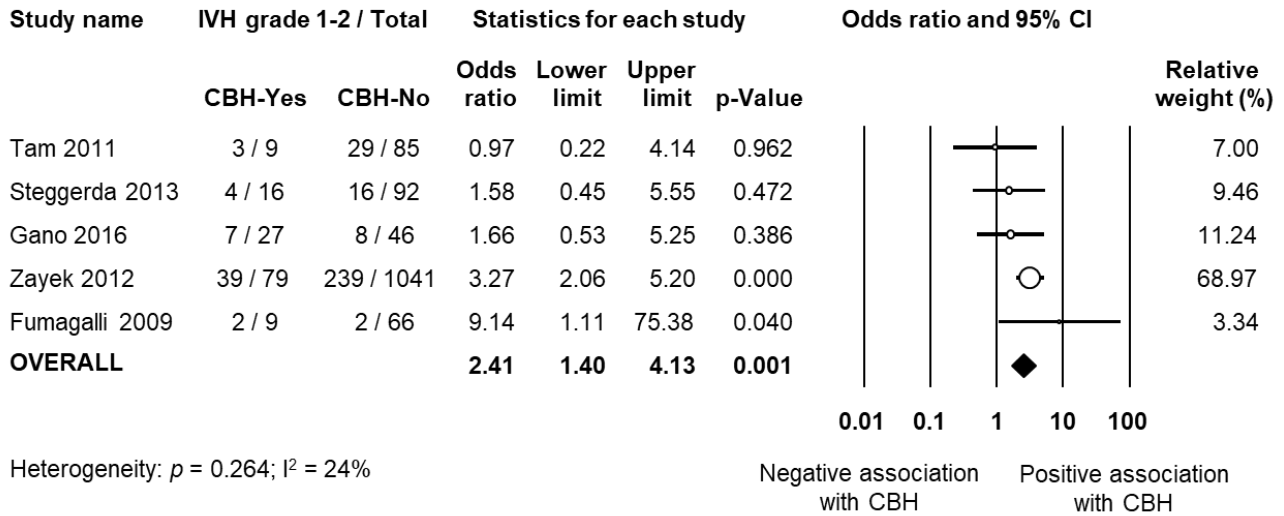

**Supplementary Figure 15.** Meta-analysis of cerebellar hemorrhage (CBH) and intraventricular hemorrhage (IVH) grade 1-2. CI: confidence interval.

**CBH and IVH grade 3-4 (k = 6)**

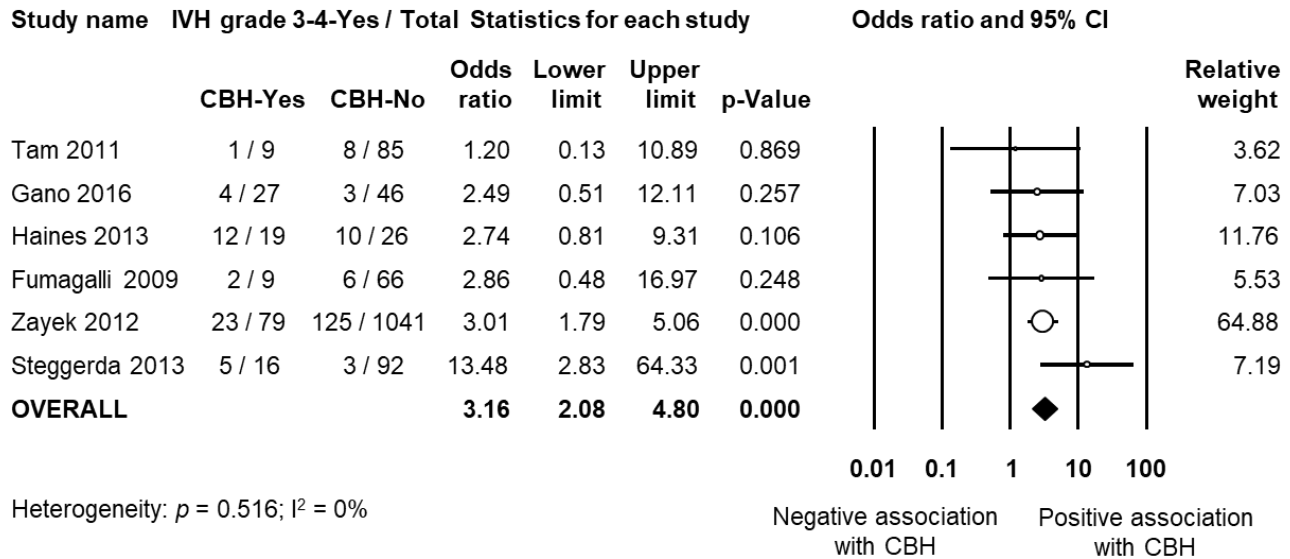

**Supplementary Figure 16.** Meta-analysis of cerebellar hemorrhage (CBH) and intraventricular hemorrhage (IVH) grade 3-4. CI: confidence interval.

### 3 References

- Biran, V., Bodiou, A.-M., Zana, E., Gaudin, A., Farnoux, C., Hovhannisyan, S., Alison, M., Elmaleh, M., Oury, J.-F., and Maury, L. (2011). Lésions acquises du cervelet chez le grand prématuré: prévalence, facteurs de risque et conséquences fonctionnelles. *Arch Pediatr* 18, 261-266.
- Chau, V., Brant, R., Poskitt, K.J., Tam, E.W., Synnes, A., and Miller, S.P. (2012). Postnatal infection is associated with widespread abnormalities of brain development in premature newborns. *Pediatr Res* 71, 274.
- Duerden, E.G., Brown-Lum, M., Chau, V., Poskitt, K.J., Grunau, R.E., Synnes, A., and Miller, S.P. (2013). Resuscitation intensity at birth is associated with changes in brain metabolic development in preterm neonates. *Neuroradiology* 55, 47-54.
- Dyet, L.E., Kennea, N., Counsell, S.J., Maalouf, E.F., Ajayi-Obe, M., Duggan, P.J., Harrison, M., Allsop, J.M., Hajnal, J., and Herlihy, A.H. (2006). Natural history of brain lesions in extremely preterm infants studied with serial magnetic resonance imaging from birth and neurodevelopmental assessment. *Pediatrics* 118, 536-548.
- Fumagalli, M., Ramenghi, L.A., Righini, A., Groppo, M., Bassi, L., De Carli, A., Parazzini, C., Triulzi, F., and Mosca, F. (2009). Cerebellar haemorrhages and pons development in extremely low birth weight infants. *Front Biosci* 1, 537-541.
- Gano, D., Ho, M.-L., Partridge, J.C., Glass, H.C., Xu, D., Barkovich, A.J., and Ferriero, D.M. (2016). Antenatal exposure to magnesium sulfate is associated with reduced cerebellar hemorrhage in preterm newborns. *J Pediatr* 178, 68-74.
- Haines, K.M., Wang, W., and Pierson, C.R. (2013). Cerebellar hemorrhagic injury in premature infants occurs during a vulnerable developmental period and is associated with wider neuropathology. *Acta Neuropathol Commun* 1, 69.
- Kidokoro, H., Anderson, P.J., Doyle, L.W., Woodward, L.J., Neil, J.J., and Inder, T.E. (2014). Brain injury and altered brain growth in preterm infants: predictors and prognosis. *Pediatrics*, peds. 2013-2336.
- Limperopoulos, C., Bassan, H., Gauvreau, K., Robertson, R.L., Sullivan, N.R., Benson, C.B., Avery, L., Stewart, J., Soul, J.S., and Ringer, S.A. (2007). Does cerebellar injury in premature infants contribute to the high prevalence of long-term cognitive, learning, and behavioral disability in survivors? *Pediatrics* 120, 584-593.
- Limperopoulos, C., Benson, C.B., Bassan, H., Disalvo, D.N., Kinnamon, D.D., Moore, M., Ringer, S.A., Volpe, J.J., and Du Plessis, A.J. (2005). Cerebellar hemorrhage in the preterm infant: ultrasonographic findings and risk factors. *Pediatrics* 116, 717-724.
- Neubauer, V., Djurdjevic, T., Griesmaier, E., Biermayr, M., Gizewski, E.R., and Kiechl-Kohlendorfer, U. (2017). Routine magnetic resonance imaging at term-equivalent age detects brain injury in 25% of a contemporary cohort of very preterm infants. *PloS one* 12, e0169442.
- O'shea, T.M., Kuban, K.C., Allred, E.N., Paneth, N., Pagano, M., Dammann, O., Bostic, L., Brooklier, K., Butler, S., and Goldstein, D.J. (2008). Neonatal cranial ultrasound lesions and developmental delays at 2 years of age among extremely low gestational age children. *Pediatrics* 122, e662.
- Steggerda, S.J., De Bruïne, F.T., Van Den Berg-Huysmans, A.A., Rijken, M., Leijser, L.M., Walther, F.J., and Van Wezel-Meijler, G. (2013). Small cerebellar hemorrhage in preterm infants: perinatal and postnatal factors and outcome. *Cerebellum* 12, 794-801.
- Tam, E.W., Rosenbluth, G., Rogers, E.E., Ferriero, D.M., Glidden, D., Goldstein, R.B., Glass, H.C., Picuch, R.E., and Barkovich, A.J. (2011). Cerebellar hemorrhage on magnetic resonance imaging in preterm newborns associated with abnormal neurologic outcome. *J Pediatr* 158, 245-250.

Zayek, M., Benjamin, J., Maertens, P., Trimm, R., Lal, C., and Eyal, F. (2012). Cerebellar hemorrhage: a major morbidity in extremely preterm infants. *J Perinatol* 32, 699.
